# Supplementary material for: Are Veterinary Costs and Socioeconomic Status Risk Factors for Companion Animal Relinquishment in the Republic of Korea?
Source: MDPI journal article supplement (doi:10.3390/ani13213406), 2023-11-02
Supplement: s1 [file s1]

## Supplementary Material

**Table S1.** Observed Regions and Human Population, Local Tax Burden Amount Per

Resident, and Numbers of Animal Relinquishments in 2020 and 2021 used in the Analysis<sup>1</sup>.

| Observed region                                     | Human Population in 2020 | Local tax burden amount per resident (thousand KRW) in 2020 | Number of Animal relinquishment in 2020 | Human Population in 2021 | Local tax burden amount per resident (thousand KRW) in 2021 | Number of Animal relinquishment in 2021 |
|-----------------------------------------------------|--------------------------|-------------------------------------------------------------|-----------------------------------------|--------------------------|-------------------------------------------------------------|-----------------------------------------|
| Seoul Metropolitan City: 25 of 25 local governments |                          |                                                             |                                         |                          |                                                             |                                         |
| Seoul_1                                             | 533,042                  | 691                                                         | 242                                     | 529,102                  | 837                                                         | 137                                     |
| Seoul_2                                             | 462,664                  | 284                                                         | 378                                     | 460,067                  | 303                                                         | 374                                     |
| Seoul_3                                             | 299,182                  | 253                                                         | 298                                     | 293,660                  | 291                                                         | 239                                     |
| Seoul_4                                             | 574,315                  | 247                                                         | 252                                     | 569,166                  | 271                                                         | 164                                     |
| Seoul_5                                             | 485,699                  | 194                                                         | 693                                     | 486,752                  | 221                                                         | 597                                     |
| Seoul_6                                             | 339,996                  | 273                                                         | 184                                     | 337,416                  | 322                                                         | 153                                     |
| Seoul_7                                             | 396,754                  | 249                                                         | 147                                     | 395,315                  | 280                                                         | 191                                     |
| Seoul_8                                             | 230,811                  | 398                                                         | 177                                     | 229,642                  | 453                                                         | 131                                     |
| Seoul_9                                             | 510,956                  | 179                                                         | 249                                     | 503,734                  | 206                                                         | 182                                     |
| Seoul_10                                            | 317,366                  | 240                                                         | 242                                     | 311,694                  | 281                                                         | 156                                     |
| Seoul_11                                            | 337,400                  | 263                                                         | 264                                     | 336,644                  | 315                                                         | 206                                     |
| Seoul_12                                            | 385,483                  | 255                                                         | 260                                     | 380,596                  | 294                                                         | 230                                     |
| Seoul_13                                            | 368,905                  | 370                                                         | 341                                     | 364,638                  | 414                                                         | 315                                     |
| Seoul_14                                            | 304,819                  | 306                                                         | 128                                     | 306,337                  | 355                                                         | 139                                     |
| Seoul_15                                            | 412,279                  | 626                                                         | 146                                     | 404,325                  | 736                                                         | 178                                     |
| Seoul_16                                            | 285,990                  | 376                                                         | 163                                     | 281,000                  | 442                                                         | 152                                     |
| Seoul_17                                            | 430,528                  | 224                                                         | 197                                     | 430,397                  | 239                                                         | 234                                     |
| Seoul_18                                            | 658,338                  | 325                                                         | 246                                     | 658,801                  | 388                                                         | 196                                     |
| Seoul_19                                            | 447,302                  | 243                                                         | 325                                     | 440,881                  | 285                                                         | 262                                     |
| Seoul_20                                            | 376,837                  | 431                                                         | 140                                     | 375,675                  | 471                                                         | 164                                     |
| Seoul_21                                            | 222,953                  | 599                                                         | 256                                     | 218,650                  | 647                                                         | 264                                     |
| Seoul_22                                            | 473,307                  | 199                                                         | 261                                     | 466,746                  | 225                                                         | 276                                     |
| Seoul_23                                            | 144,683                  | 832                                                         | 209                                     | 141,379                  | 910                                                         | 179                                     |
| Seoul_24                                            | 122,499                  | 1330                                                        | 94                                      | 120,437                  | 1509                                                        | 88                                      |
| Seoul_25                                            | 533,042                  | 206                                                         | 251                                     | 385,318                  | 244                                                         | 219                                     |
| Busan Metropolitan City: 12 of 16 local governments |                          |                                                             |                                         |                          |                                                             |                                         |
| Busan_1                                             | 142,918                  | 940                                                         | 769                                     | 143,207                  | 953                                                         | 764                                     |
| Busan_2                                             | 228,049                  | 211                                                         | 502                                     | 221,256                  | 229                                                         | 475                                     |
| Busan_3                                             | 177,125                  | 806                                                         | 503                                     | 178,614                  | 788                                                         | 482                                     |
| Busan_4                                             | 262,069                  | 227                                                         | 428                                     | 256,333                  | 271                                                         | 328                                     |
| Busan_5                                             | 266,866                  | 225                                                         | 392                                     | 273,226                  | 240                                                         | 347                                     |
| Busan_6                                             | 353,159                  | 258                                                         | 619                                     | 355,917                  | 272                                                         | 545                                     |
| Busan_7                                             | 283,211                  | 153                                                         | 490                                     | 278,857                  | 160                                                         | 455                                     |

<sup>1</sup> The numbers of animal relinquishments of observed regions were obtained from the 2021 and 2022 annual reports on animal relinquishment by the Korean Animal Welfare Association.

**Table S1.** Observed Regions and Human Population, Local Tax Burden Amount Per Resident, and Numbers of Animal Relinquishments in 2020 and 2021 used in the Analysis<sup>1</sup> (continued).

| Observed region                                      | Human Population in 2020 | Local tax burden amount per resident (thousand KRW) in 2020 | Number of Animal relinquishment in 2020 | Human Population in 2021 | Local tax burden amount per resident (thousand KRW) in 2021 | Number of Animal relinquishment in 2021 |
|------------------------------------------------------|--------------------------|-------------------------------------------------------------|-----------------------------------------|--------------------------|-------------------------------------------------------------|-----------------------------------------|
| Busan_8                                              | 306,003                  | 199                                                         | 760                                     | 301,987                  | 215                                                         | 669                                     |
| Busan_9                                              | 105,164                  | 233                                                         | 515                                     | 105,192                  | 241                                                         | 436                                     |
| Busan_10                                             | 175,095                  | 250                                                         | 336                                     | 174,806                  | 280                                                         | 322                                     |
| Busan_11                                             | 207,144                  | 216                                                         | 417                                     | 203,536                  | 249                                                         | 366                                     |
| Busan_12                                             | 396,438                  | 333                                                         | 659                                     | 386,785                  | 358                                                         | 480                                     |
| Daegu Metropolitan City: 8 of 8 local governments    |                          |                                                             |                                         |                          |                                                             |                                         |
| Daegu_1                                              | 143,175                  | 202                                                         | 387                                     | 141,519                  | 212                                                         | 301                                     |
| Daegu_2                                              | 544,926                  | 243                                                         | 592                                     | 536,989                  | 261                                                         | 525                                     |
| Daegu_3                                              | 262,451                  | 693                                                         | 1047                                    | 263,162                  | 748                                                         | 909                                     |
| Daegu_4                                              | 341,436                  | 249                                                         | 528                                     | 339,530                  | 262                                                         | 408                                     |
| Daegu_5                                              | 437,008                  | 205                                                         | 463                                     | 430,912                  | 221                                                         | 415                                     |
| Daegu_6                                              | 164,528                  | 231                                                         | 646                                     | 159,827                  | 244                                                         | 684                                     |
| Daegu_7                                              | 417,097                  | 291                                                         | 1004                                    | 411,553                  | 333                                                         | 803                                     |
| Daegu_8                                              | 74,791                   | 598                                                         | 345                                     | 80,199                   | 653                                                         | 362                                     |
| Incheon Metropolitan City: 9 of 10 local governments |                          |                                                             |                                         |                          |                                                             |                                         |
| Incheon_1                                            | 69,693                   | 635                                                         | 779                                     | 69,803                   | 642                                                         | 636                                     |
| Incheon_2                                            | 295,696                  | 174                                                         | 762                                     | 288,856                  | 187                                                         | 513                                     |
| Incheon_3                                            | 518,272                  | 248                                                         | 704                                     | 506,181                  | 274                                                         | 625                                     |
| Incheon_4                                            | 61,486                   | 326                                                         | 149                                     | 58,999                   | 334                                                         | 122                                     |
| Incheon_5                                            | 407,464                  | 188                                                         | 711                                     | 406,004                  | 193                                                         | 637                                     |
| Incheon_6                                            | 486,765                  | 198                                                         | 1084                                    | 489,118                  | 213                                                         | 1222                                    |
| Incheon_7                                            | 555,380                  | 391                                                         | 1004                                    | 589,013                  | 428                                                         | 969                                     |
| Incheon_8                                            | 389,644                  | 417                                                         | 441                                     | 385,796                  | 408                                                         | 320                                     |
| Incheon_9                                            | 143,633                  | 1,027                                                       | 860                                     | 152,931                  | 1,019                                                       | 817                                     |
| Gwangju Metropolitan City: 5 of 5 local governments  |                          |                                                             |                                         |                          |                                                             |                                         |
| Gwangju_1                                            | 404,221                  | 240                                                         | 921                                     | 400,654                  | 239                                                         | 829                                     |
| Gwangju_2                                            | 215,575                  | 148                                                         | 479                                     | 212,379                  | 199                                                         | 499                                     |
| Gwangju_3                                            | 103,470                  | 267                                                         | 359                                     | 105,909                  | 295                                                         | 322                                     |
| Gwangju_4                                            | 427,114                  | 160                                                         | 1202                                    | 424,707                  | 182                                                         | 1043                                    |
| Gwangju_5                                            | 291,231                  | 215                                                         | 595                                     | 287,401                  | 224                                                         | 592                                     |
| Daejeon Metropolitan City: 5 of 5 local governments  |                          |                                                             |                                         |                          |                                                             |                                         |
| Daejeon_1                                            | 175,046                  | 277                                                         | 493                                     | 172,746                  | 290                                                         | 332                                     |
| Daejeon_2                                            | 222,222                  | 190                                                         | 597                                     | 219,751                  | 201                                                         | 439                                     |
| Daejeon_3                                            | 473,365                  | 196                                                         | 799                                     | 470,374                  | 213                                                         | 470                                     |
| Daejeon_4                                            | 351,277                  | 321                                                         | 647                                     | 356,093                  | 334                                                         | 448                                     |
| Daejeon_5                                            | 230,341                  | 190                                                         | 681                                     | 227,108                  | 177                                                         | 420                                     |

<sup>1</sup> The numbers of animal relinquishments of observed regions were obtained from the 2021 and 2022 annual reports on animal relinquishment by the Korean Animal Welfare Association.

**Table S1.** Observed Regions and Human Population, Local Tax Burden Amount Per Resident, and Numbers of Animal Relinquishments in 2020 and 2021 used in the Analysis<sup>1</sup>  
(continued).

| Observed region                                      | Human Population in 2020 | Local tax burden amount per resident (thousand KRW) in 2020 | Number of Animal relinquishment in 2020 | Human Population in 2021 | Local tax burden amount per resident (thousand KRW) in 2021 | Number of Animal relinquishment in 2021 |
|------------------------------------------------------|--------------------------|-------------------------------------------------------------|-----------------------------------------|--------------------------|-------------------------------------------------------------|-----------------------------------------|
| Ulsan Metropolitan City: 25 of 25 local governments  |                          |                                                             |                                         |                          |                                                             |                                         |
| Ulsan_1                                              | 313,819                  | 351                                                         | 931                                     | 310,638                  | 359                                                         | 795                                     |
| Ulsan_2                                              | 154,096                  | 257                                                         | 422                                     | 151,711                  | 267                                                         | 396                                     |
| Ulsan_3                                              | 218,735                  | 347                                                         | 436                                     | 218,670                  | 356                                                         | 325                                     |
| Ulsan_4                                              | 222,059                  | 1,196                                                       | 1123                                    | 221,512                  | 1,081                                                       | 986                                     |
| Ulsan_5                                              | 212,883                  | 203                                                         | 422                                     | 208,132                  | 218                                                         | 424                                     |
| Sejong Self-Governing City: 1 of 1 local governments |                          |                                                             |                                         |                          |                                                             |                                         |
| Sejong                                               | 371,895                  | 1,970                                                       | 330                                     | 383,591                  | 2,067                                                       | 537                                     |
| Gyeonggi-Do: 24 of 31 local governments              |                          |                                                             |                                         |                          |                                                             |                                         |
| Gyeonggi_1                                           | 62,264                   | 884                                                         | 287                                     | 62,150                   | 933                                                         | 238                                     |
| Gyeonggi_2                                           | 1,079,353                | 565                                                         | 1369                                    | 1,076,535                | 568                                                         | 1217                                    |
| Gyeonggi_3                                           | 292,893                  | 602                                                         | 331                                     | 287,945                  | 668                                                         | 330                                     |
| Gyeonggi_4                                           | 387,289                  | 806                                                         | 1109                                    | 391,462                  | 803                                                         | 1045                                    |
| Gyeonggi_5                                           | 191,948                  | 564                                                         | 152                                     | 188,701                  | 570                                                         | 175                                     |
| Gyeonggi_6                                           | 268,535                  | 625                                                         | 389                                     | 266,213                  | 664                                                         | 178                                     |
| Gyeonggi_7                                           | 733,798                  | 543                                                         | 1936                                    | 737,353                  | 563                                                         | 1701                                    |
| Gyeonggi_8                                           | 93,592                   | 494                                                         | 241                                     | 91,546                   | 505                                                         | 213                                     |
| Gyeonggi_9                                           | 806,067                  | 517                                                         | 1172                                    | 790,128                  | 560                                                         | 978                                     |
| Gyeonggi_10                                          | 930,948                  | 1,160                                                       | 978                                     | 922,518                  | 1,215                                                       | 856                                     |
| Gyeonggi_11                                          | 1,183,714                | 746                                                         | 1081                                    | 1,190,964                | 755                                                         | 919                                     |
| Gyeonggi_12                                          | 512,030                  | 733                                                         | 794                                     | 512,912                  | 710                                                         | 852                                     |
| Gyeonggi_13                                          | 652,726                  | 710                                                         | 1621                                    | 641,660                  | 714                                                         | 1332                                    |
| Gyeonggi_14                                          | 189,534                  | 983                                                         | 1093                                    | 188,842                  | 1,065                                                       | 936                                     |
| Gyeonggi_15                                          | 547,178                  | 706                                                         | 391                                     | 548,228                  | 747                                                         | 261                                     |
| Gyeonggi_16                                          | 236,368                  | 730                                                         | 702                                     | 243,432                  | 730                                                         | 642                                     |
| Gyeonggi_17                                          | 1,077,508                | 838                                                         | 931                                     | 1,074,971                | 866                                                         | 939                                     |
| Gyeonggi_18                                          | 163,356                  | 768                                                         | 163                                     | 160,221                  | 725                                                         | 135                                     |
| Gyeonggi_19                                          | 463,661                  | 440                                                         | 466                                     | 463,724                  | 432                                                         | 400                                     |
| Gyeonggi_20                                          | 223,177                  | 1,362                                                       | 922                                     | 222,721                  | 1,283                                                       | 822                                     |
| Gyeonggi_21                                          | 483,245                  | 723                                                         | 766                                     | 495,315                  | 702                                                         | 777                                     |
| Gyeonggi_22                                          | 564,288                  | 1,055                                                       | 2938                                    | 578,529                  | 1,069                                                       | 2121                                    |
| Gyeonggi_23                                          | 320,087                  | 764                                                         | 580                                     | 326,059                  | 920                                                         | 602                                     |
| Gyeonggi_24                                          | 887,015                  | 1,375                                                       | 2224                                    | 910,814                  | 1,257                                                       | 1796                                    |

<sup>1</sup> The numbers of animal relinquishments of observed regions were obtained from the 2021 and 2022 annual reports on animal relinquishment by the Korean Animal Welfare Association.

**Table S1.** Observed Regions and Human Population, Local Tax Burden Amount Per Resident, and Numbers of Animal Relinquishments in 2020 and 2021 used in the Analysis<sup>1</sup>  
(continued).

| Observed region                              | Human Population in 2020 | Local tax burden amount per resident (thousand KRW) in 2020 | Number of Animal relinquishment in 2020 | Human Population in 2021 | Local tax burden amount per resident (thousand KRW) in 2021 | Number of Animal relinquishment in 2021 |
|----------------------------------------------|--------------------------|-------------------------------------------------------------|-----------------------------------------|--------------------------|-------------------------------------------------------------|-----------------------------------------|
| Gangwon-Do: 4 of 18 local governments        |                          |                                                             |                                         |                          |                                                             |                                         |
| Gangwon_1                                    | 212,965                  | 591                                                         | 558                                     | 211,381                  | 567                                                         | 689                                     |
| Gangwon_2                                    | 82,791                   | 538                                                         | 422                                     | 82,806                   | 601                                                         | 356                                     |
| Gangwon_3                                    | 357,757                  | 507                                                         | 1,041                                   | 360,807                  | 507                                                         | 874                                     |
| Gangwon_4                                    | 284,594                  | 658                                                         | 595                                     | 286,664                  | 665                                                         | 512                                     |
| Chungcheongbuk-Do: 5 of 11 local governments |                          |                                                             |                                         |                          |                                                             |                                         |
| Chungcheongbuk_1                             | 45,773                   | 535                                                         | 225                                     | 44,956                   | 563                                                         | 178                                     |
| Chungcheongbuk_2                             | 50,093                   | 667                                                         | 377                                     | 49,520                   | 676                                                         | 446                                     |
| Chungcheongbuk_3                             | 92,197                   | 1115                                                        | 406                                     | 92,058                   | 1126                                                        | 329                                     |
| Chungcheongbuk_4                             | 848,482                  | 651                                                         | 1742                                    | 849,573                  | 651                                                         | 1553                                    |
| Chungcheongbuk_5                             | 209,358                  | 629                                                         | 569                                     | 208,277                  | 641                                                         | 409                                     |
| Chungcheongnam-Do: 6 of 15 local governments |                          |                                                             |                                         |                          |                                                             |                                         |
| Chungcheongnam_1                             | 114,483                  | 487                                                         | 746                                     | 112,617                  | 574                                                         | 641                                     |
| Chungcheongnam_2                             | 176,645                  | 1,024                                                       | 754                                     | 176,413                  | 890                                                         | 775                                     |
| Chungcheongnam_3                             | 324,580                  | 1,018                                                       | 1300                                    | 334,539                  | 967                                                         | 1115                                    |
| Chungcheongnam_4                             | 76,801                   | 703                                                         | 517                                     | 77,385                   | 748                                                         | 483                                     |
| Chungcheongnam_5                             | 658,486                  | 732                                                         | 1000                                    | 657,559                  | 733                                                         | 1219                                    |
| Chungcheongnam_6                             | 99,324                   | 638                                                         | 730                                     | 98,068                   | 667                                                         | 537                                     |
| Jeollabuk-Do: 5 of 14 local governments      |                          |                                                             |                                         |                          |                                                             |                                         |
| Jeollabuk_1                                  | 265,304                  | 665                                                         | 1,659                                   | 262,467                  | 630                                                         | 1,225                                   |
| Jeollabuk_2                                  | 80,913                   | 656                                                         | 466                                     | 81,455                   | 698                                                         | 512                                     |
| Jeollabuk_3                                  | 91,142                   | 959                                                         | 453                                     | 92,422                   | 935                                                         | 354                                     |
| Jeollabuk_4                                  | 278,113                  | 561                                                         | 1,478                                   | 273,697                  | 563                                                         | 1,621                                   |
| Jeollabuk_5                                  | 657,269                  | 575                                                         | 2,196                                   | 651,495                  | 583                                                         | 2,160                                   |
| Jeollanam-Do: 3 of 22 local governments      |                          |                                                             |                                         |                          |                                                             |                                         |
| Jeollanam_1                                  | 116,726                  | 941                                                         | 634                                     | 116,456                  | 900                                                         | 1018                                    |
| Jeollanam_2                                  | 218,589                  | 455                                                         | 1289                                    | 216,939                  | 483                                                         | 1096                                    |
| Jeollanam_3                                  | 281,436                  | 544                                                         | 558                                     | 278,737                  | 516                                                         | 648                                     |

<sup>1</sup> The numbers of animal relinquishments of observed regions were obtained from the 2021 and 2022 annual reports on animal relinquishment by the Korean Animal Welfare Association.

**Table S1.** Observed Regions and Human Population, Local Tax Burden Amount Per Resident, and Numbers of Animal Relinquishments in 2020 and 2021 used in the Analysis<sup>1</sup>  
(continued).

| Observed region                                        | Human Population in 2020 | Local tax burden amount per resident (thousand KRW) in 2020 | Number of Animal relinquishment in 2020 | Human Population in 2021 | Local tax burden amount per resident (thousand KRW) in 2021 | Number of Animal relinquishment in 2021 |
|--------------------------------------------------------|--------------------------|-------------------------------------------------------------|-----------------------------------------|--------------------------|-------------------------------------------------------------|-----------------------------------------|
| Gyeongsangbuk-Do: 4 of 23 local governments            |                          |                                                             |                                         |                          |                                                             |                                         |
| Gyeongsangbuk_1                                        | 268,369                  | 695                                                         | 1,019                                   | 267,725                  | 681                                                         | 931                                     |
| Gyeongsangbuk_2                                        | 412,581                  | 838                                                         | 165                                     | 408,110                  | 662                                                         | 577                                     |
| Gyeongsangbuk_3                                        | 140,239                  | 651                                                         | 504                                     | 139,324                  | 640                                                         | 424                                     |
| Gyeongsangbuk_4                                        | 503,852                  | 744                                                         | 1,748                                   | 496,650                  | 681                                                         | 1,464                                   |
| Gyeongsangnam-Do: 6 of 18 local governments            |                          |                                                             |                                         |                          |                                                             |                                         |
| Gyeongsangnam_1                                        | 241,216                  | 593                                                         | 1,424                                   | 236,662                  | 612                                                         | 1,225                                   |
| Gyeongsangnam_2                                        | 537,673                  | 731                                                         | 1,749                                   | 535,129                  | 704                                                         | 1,554                                   |
| Gyeongsangnam_3                                        | 103,525                  | 744                                                         | 1,960                                   | 102,945                  | 800                                                         | 2,008                                   |
| Gyeongsangnam_4                                        | 354,726                  | 838                                                         | 366                                     | 353,792                  | 818                                                         | 218                                     |
| Gyeongsangnam_5                                        | 347,097                  | 620                                                         | 541                                     | 343,782                  | 629                                                         | 662                                     |
| Gyeongsangnam_6                                        | 1,032,741                | 730                                                         | 1,884                                   | 1,021,487                | 750                                                         | 1,389                                   |
| Jeju Self-Governing Province: 1 of 1 local governments |                          |                                                             |                                         |                          |                                                             |                                         |
| Jeju                                                   | 676,759                  | 2,327                                                       | 6,303                                   | 678,159                  | 2,257                                                       | 5,235                                   |

<sup>1</sup> The numbers of animal relinquishments of observed regions were obtained from the 2021 and 2022 annual reports on animal relinquishment by the Korean Animal Welfare Association.
